# Supplementary material
Source: PubMed Central journal article supplement (PMC4565796)
Supplement: NIHMS665239-supplement.pdf [file NIHMS665239-supplement.pdf]

## Supplementary Information

### *Dual pH- and Temperature-Responsive Protein Nanoparticles*

Nicholas M. Matsumoto,<sup>a</sup> George W. Buchman,<sup>b</sup> Leonard H. Rome,<sup>c</sup>  
and Heather D. Maynard\*<sup>a</sup>

<sup>a</sup> Department of Chemistry and Biochemistry and California Nanosystems Institute, 607 Charles E. Young Drive East, University of California, Los Angeles, CA 90095-1569.

<sup>b</sup> Paragon Bioservices, Inc., 801 W. Baltimore Street, Suite 401, Baltimore, MD 21201

<sup>c</sup> Department of Biological Chemistry, David Geffen School of Medicine and California Nanosystems Institute, University of California, Los Angeles, CA 90095.

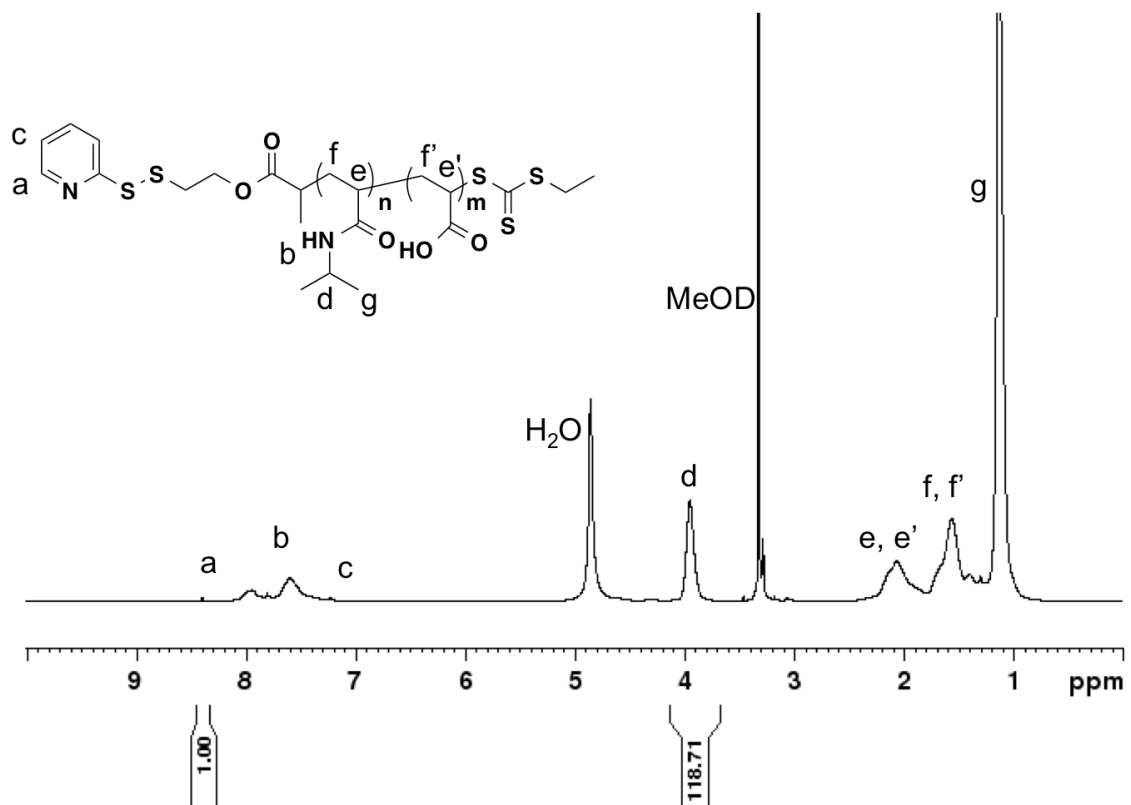

**Figure E1.** <sup>1</sup>H NMR (500 MHz, MeOD) of **polymer 1**.

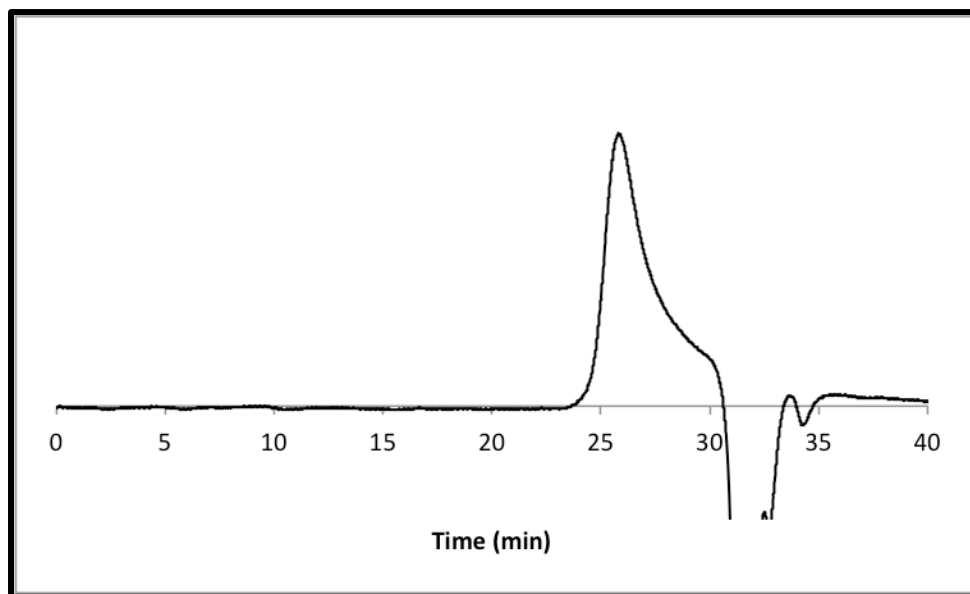

**Figure E2.** GPC chromatogram of **polymer 1**, normalized and analyzed by comparison with monodisperse PMMA standards.

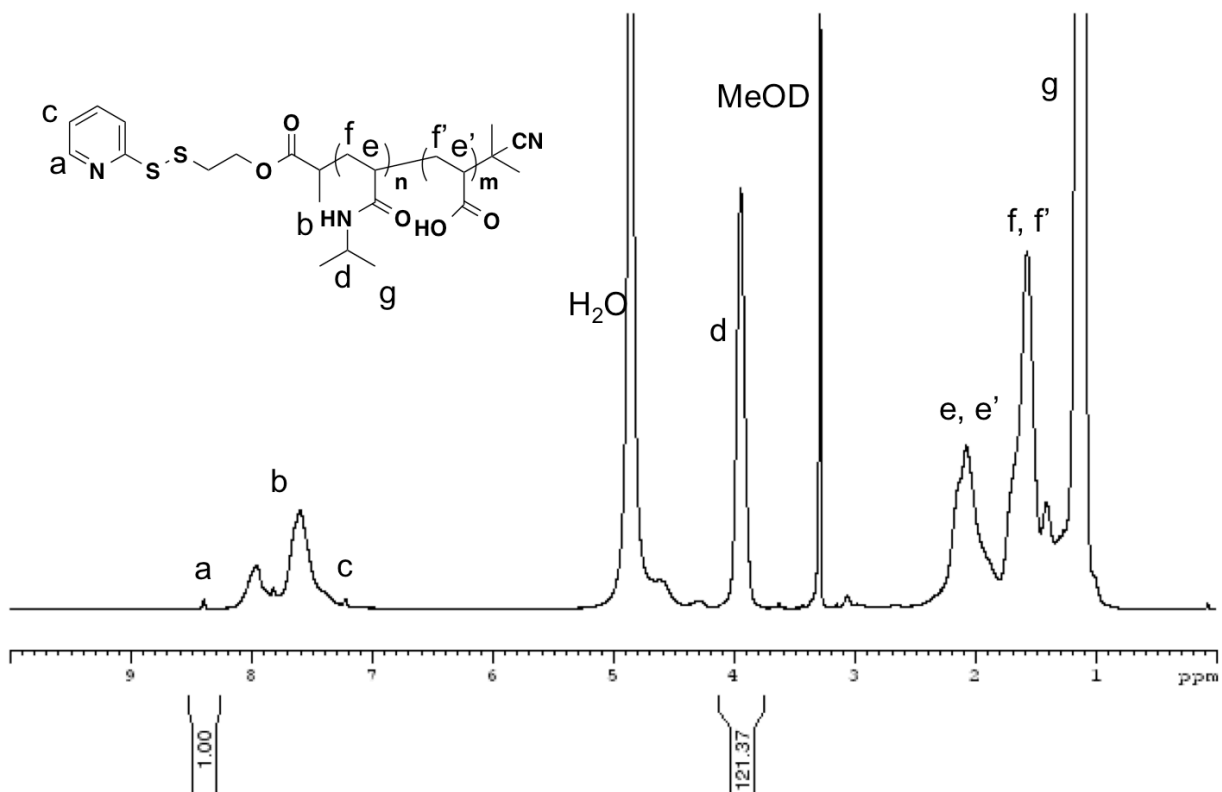

**Figure E3.**  $^1\text{H}$  NMR (500 MHz, MeOD) of **polymer 2**.

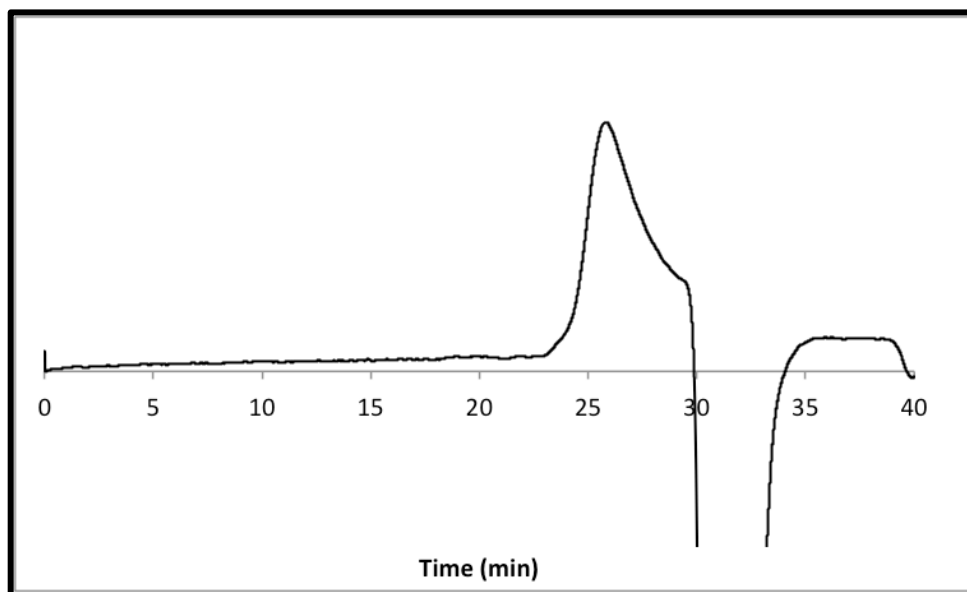

**Figure E4.** GPC chromatogram of **polymer 2**, normalized and analyzed by comparison with monodisperse PMMA standards.
